# Supplementary material for: Feasibility analysis of conducting observational studies with the electronic health record
Source: PubMed Central journal article supplement (PMC6819452; doi:10.1186/s12911-019-0939-0), 2019-10-28

## Supplementary Material

# Screenshot: Frequency tables

Tabellen Diagramme Patientenakten

## Filter: Bösartige Neubildung des Pankreas

| ICD                               | OPS                                                                     | ATC                      | Sonstige      |
|-----------------------------------|-------------------------------------------------------------------------|--------------------------|---------------|
| Hauptdiagnosen                    | Strahlentherapie, nuklearmedizinische Therapie und Chemotherapie        | Antineoplastische Mittel | Geschlecht    |
| Nebendiagnosen                    | Zytostatische Chemotherapie, Immuntherapie und antiretrovirale Therapie |                          | Aufnahmealter |
| Diabetes mellitus                 | Transfusion von Blutzellen                                              |                          |               |
| Bösartige Neubildung des Pankreas | Operationen an Gallenblase und Gallenwegen                              |                          |               |
| Bösartige Neubildungen            |                                                                         |                          |               |

Zusammenführen von: --- ▾

| Kode       | Kapitel | Gruppe                                               | Kategorie                         | Subkategorie 1                             | Subkategorie 2 | Anzahl | %    |
|------------|---------|------------------------------------------------------|-----------------------------------|--------------------------------------------|----------------|--------|------|
| C25.0 (HD) | C00-C97 | C15-C26: Bösartige Neubildungen der Verdauungsorgane | Bösartige Neubildung des Pankreas | Pankreaskopf                               | NA             | 9      | 64.3 |
| C25.8 (HD) | C00-C97 | C15-C26: Bösartige Neubildungen der Verdauungsorgane | Bösartige Neubildung des Pankreas | Pankreas, mehrere Teilbereiche überlappend | NA             | 7      | 50   |
| C25.8 (ND) | C00-C97 | C15-C26: Bösartige Neubildungen der Verdauungsorgane | Bösartige Neubildung des Pankreas | Pankreas, mehrere Teilbereiche überlappend | NA             | 7      | 50   |
| C25.9 (HD) | C00-C97 | C15-C26: Bösartige Neubildungen der Verdauungsorgane | Bösartige Neubildung des Pankreas | Pankreas, nicht näher bezeichnet           | NA             | 6      | 42.9 |
| C25.9 (ND) | C00-C97 | C15-C26: Bösartige Neubildungen der Verdauungsorgane | Bösartige Neubildung des Pankreas | Pankreas, nicht näher bezeichnet           | NA             | 6      | 42.9 |
| C25.0 (ND) | C00-C97 | C15-C26: Bösartige Neubildungen der Verdauungsorgane | Bösartige Neubildung des Pankreas | Pankreaskopf                               | NA             | 4      | 28.6 |
| C25.1 (HD) | C00-C97 | C15-C26: Bösartige Neubildungen der Verdauungsorgane | Bösartige Neubildung des Pankreas | Pankreaskörper                             | NA             | 1      | 7.1  |
| C25.7 (HD) | C00-C97 | C15-C26: Bösartige Neubildungen der Verdauungsorgane | Bösartige Neubildung des Pankreas | Sonstige Teile des Pankreas                | NA             | 1      | 7.1  |

Übersicht: ICD

Übersicht: OPS

Übersicht: ATC

Übersicht: Labor

Übersicht: DRG

Übersicht: Sonstige

# Screenshot: Patient files

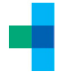

Tabellen Diagramme Patientenakten

## Patient ID: 3

Geburtsdag:  
Geschlecht:

Encounter

**757**

07.06.2008 - 07.06.2008

Patient ID: 3

ambulant

### Verlauf

#### DEM

DEM|GESCHLECHT:M - männlich  
DEM|AUFNALTER:44 - 44 Jahre

#### ICD

C25.8 (ND) Bösartige Neubildung: Pankreas, mehrere Teilbereiche überlappend - ST Station RT 52 35823 (ST52) - 2008-06-07 19:04:02

### Labor

| Code      | Name                | Wert | Flag | Einheit | Datum               |
|-----------|---------------------|------|------|---------|---------------------|
| LAB:6KREA | Kreatinin           | 0.58 | @    | mg/dl   | 2008-06-18 17:46:10 |
| LAB:6KREC | Kreatinin-Clearance | 162  | H    | ml/min  | 2008-06-18 17:46:10 |
| LAB:6UKRE | U-Kreatinin         | 85.5 | @    | mg/dl   | 2008-06-18 17:46:10 |

Encounter

**1130**

18.06.2008 - 22.06.2008

Patient ID: 3

teilstationär

### Verlauf

#### DEM

DEM|GESCHLECHT:M - männlich  
DEM|AUFNALTER:44 - 44 Jahre

#### ICD

C25.0 (HD) Bösartige Neubildung: Pankreaskopf - ST 52 (TagesKlinik) 05823 (STTAG) - 2008-06-18 15:12:00

### OPS

8-529.8 - Bestrahlungsplanung für perkutane Bestrahlung und Brachytherapie: Bestrahlungsplanung für perkutane Bestrahlung, mit individueller Dosisplanung - ST 3D-Bestrahlungsplanung (STSTD) - 2008-06-18 17:56:17  
 8-528.9 - Bestrahlungssimulation für externe Bestrahlung und Brachytherapie: Feldfestlegung mit Simulator, mit 3D-Plan - ST 3D-Bestrahlungsplanung (STSTD) - 2008-06-22 17:10:56  
 8-527.8 - Konstruktion und Anpassung von Fixations- und Behandlungshilfen bei Strahlentherapie: Individuelle Blöcke oder Viellamellenkollimator (MLC) - ST 3D-Bestrahlungsplanung (STSTD) - 2008-06-18 17:56:17  
 3-222 - Computertomographie des Thorax mit Kontrastmittel - ST Computertomographie (STCT) - 2008-06-19 17:56:26  
 3-225 - Computertomographie des Abdomens mit Kontrastmittel - ST Computertomographie (STCT) - 2008-06-19 17:56:26  
 8-528.9 - Bestrahlungssimulation für externe Bestrahlung und Brachytherapie: Feldfestlegung mit Simulator, mit 3D-Plan - ST 3D-Bestrahlungsplanung (STSTD) - 2008-06-18 17:56:17

### Labor

| Code      | Name             | Wert | Flag | Einheit | Datum               |
|-----------|------------------|------|------|---------|---------------------|
| LAB:6ALBU | Albumin          | 40.4 | @    | g/l     | 2008-06-25 19:06:10 |
| LAB:6APO  | Alk. Phosphatase | 168  | H    | U/l     | 2008-06-25 19:06:10 |

# Overview of the temporal data requirements - DPS Study

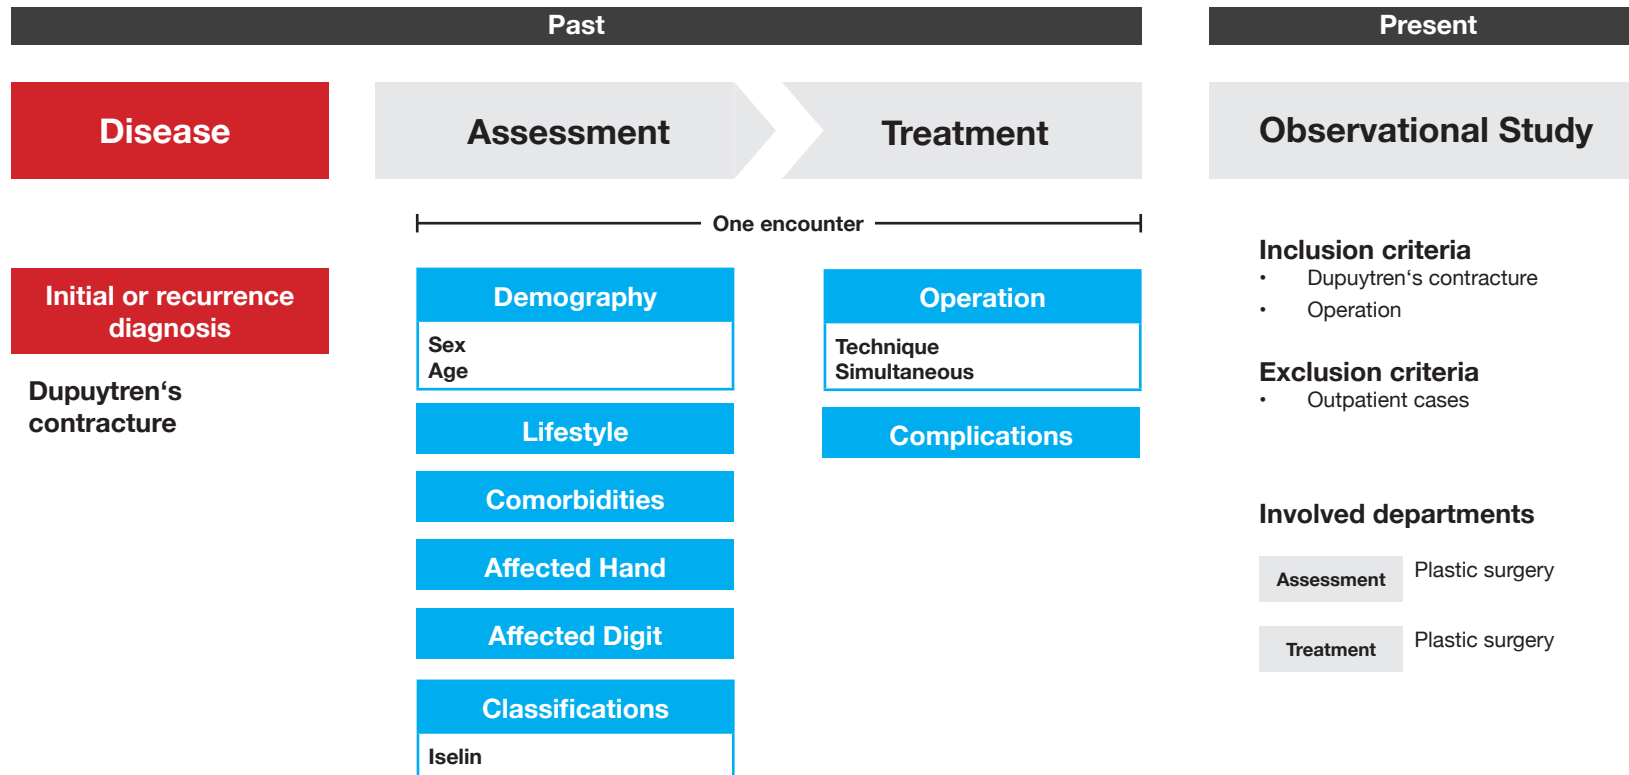

# Overview of the temporal data requirements - DG Study

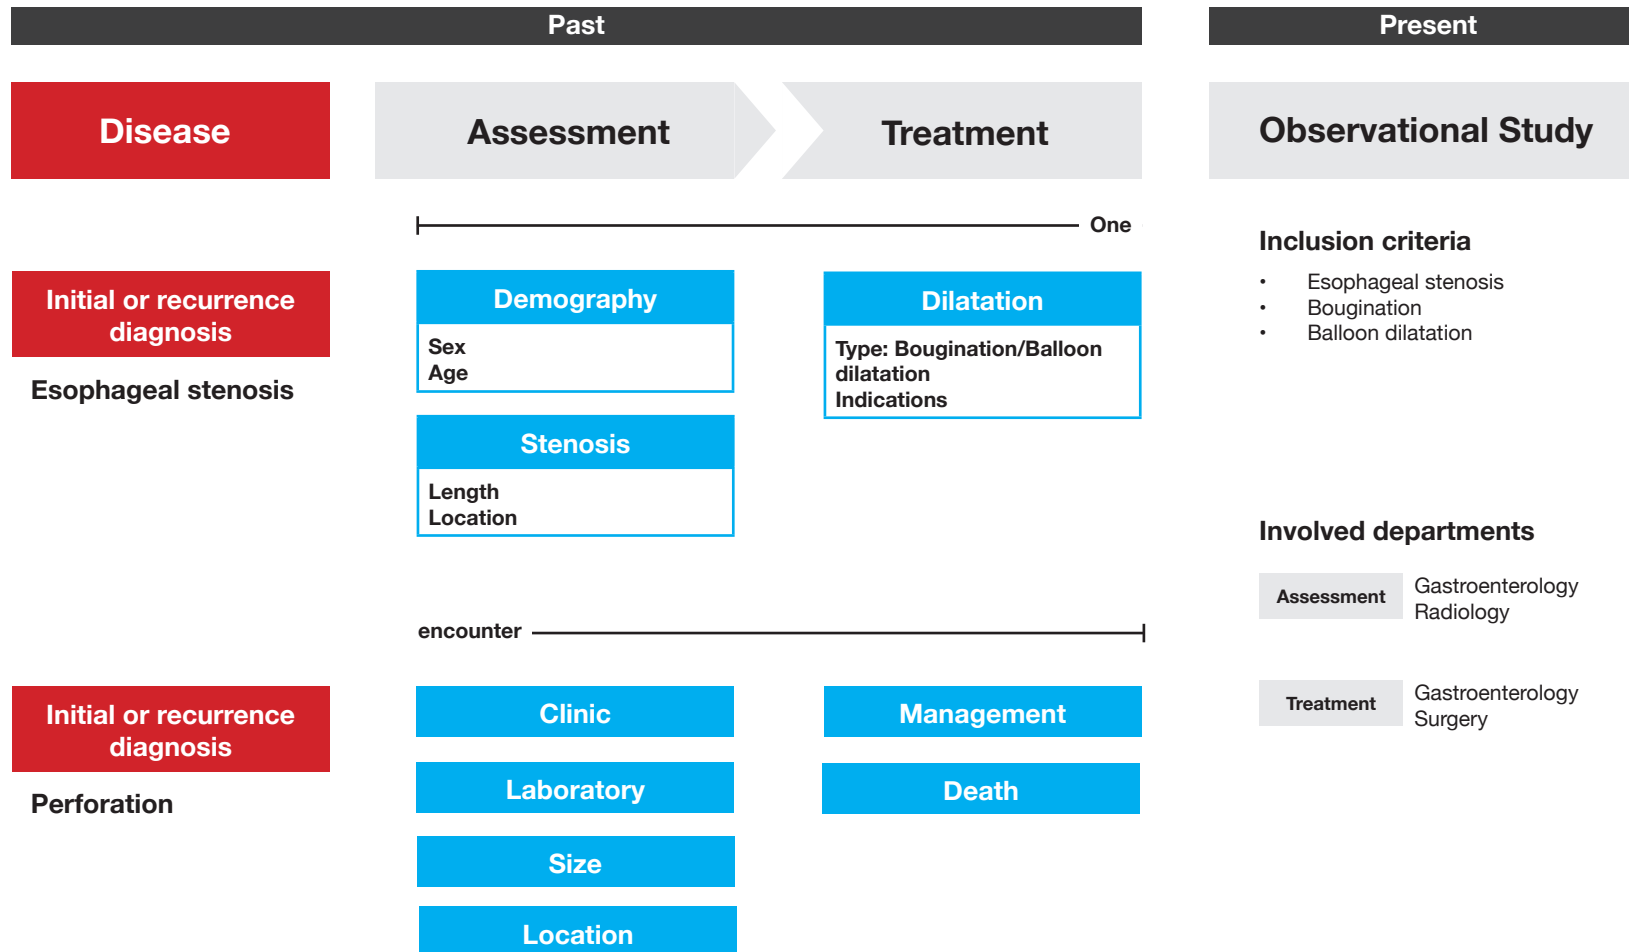

Attributes of interest

# Overview of the temporal data requirements - DRO Study

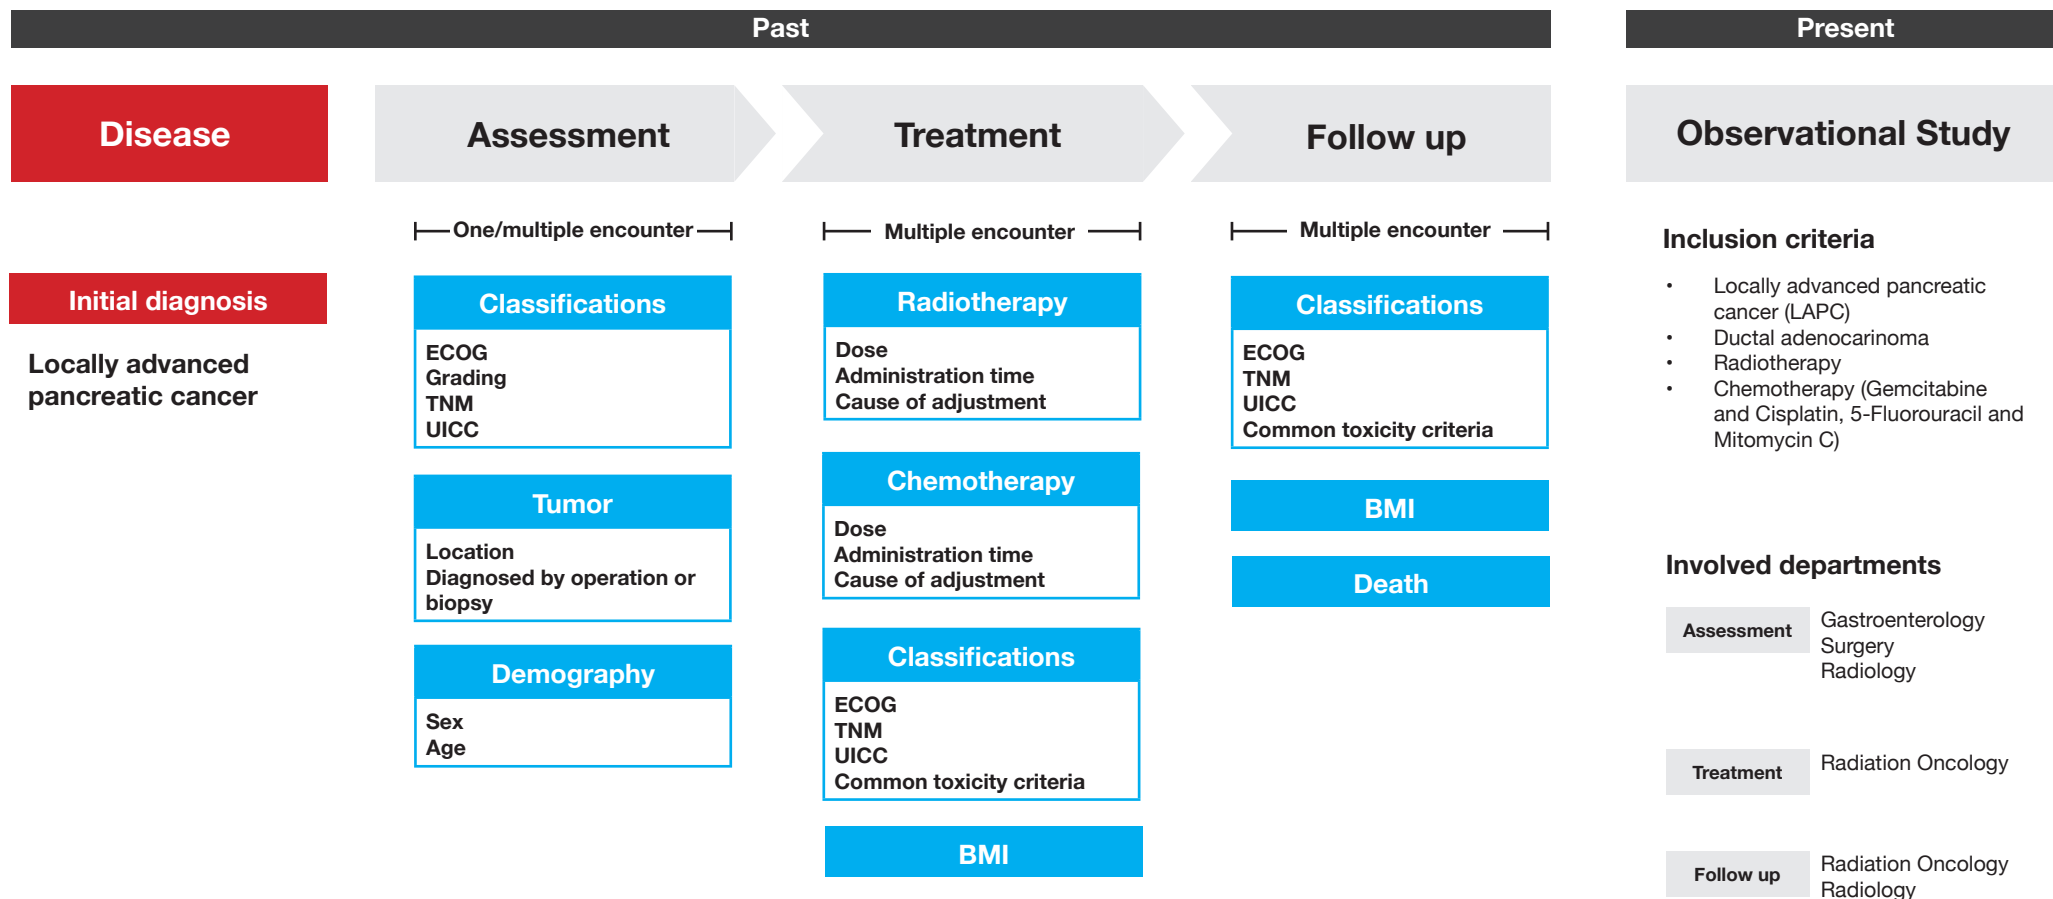

# Mapping of eligibility criteria - DPS Study

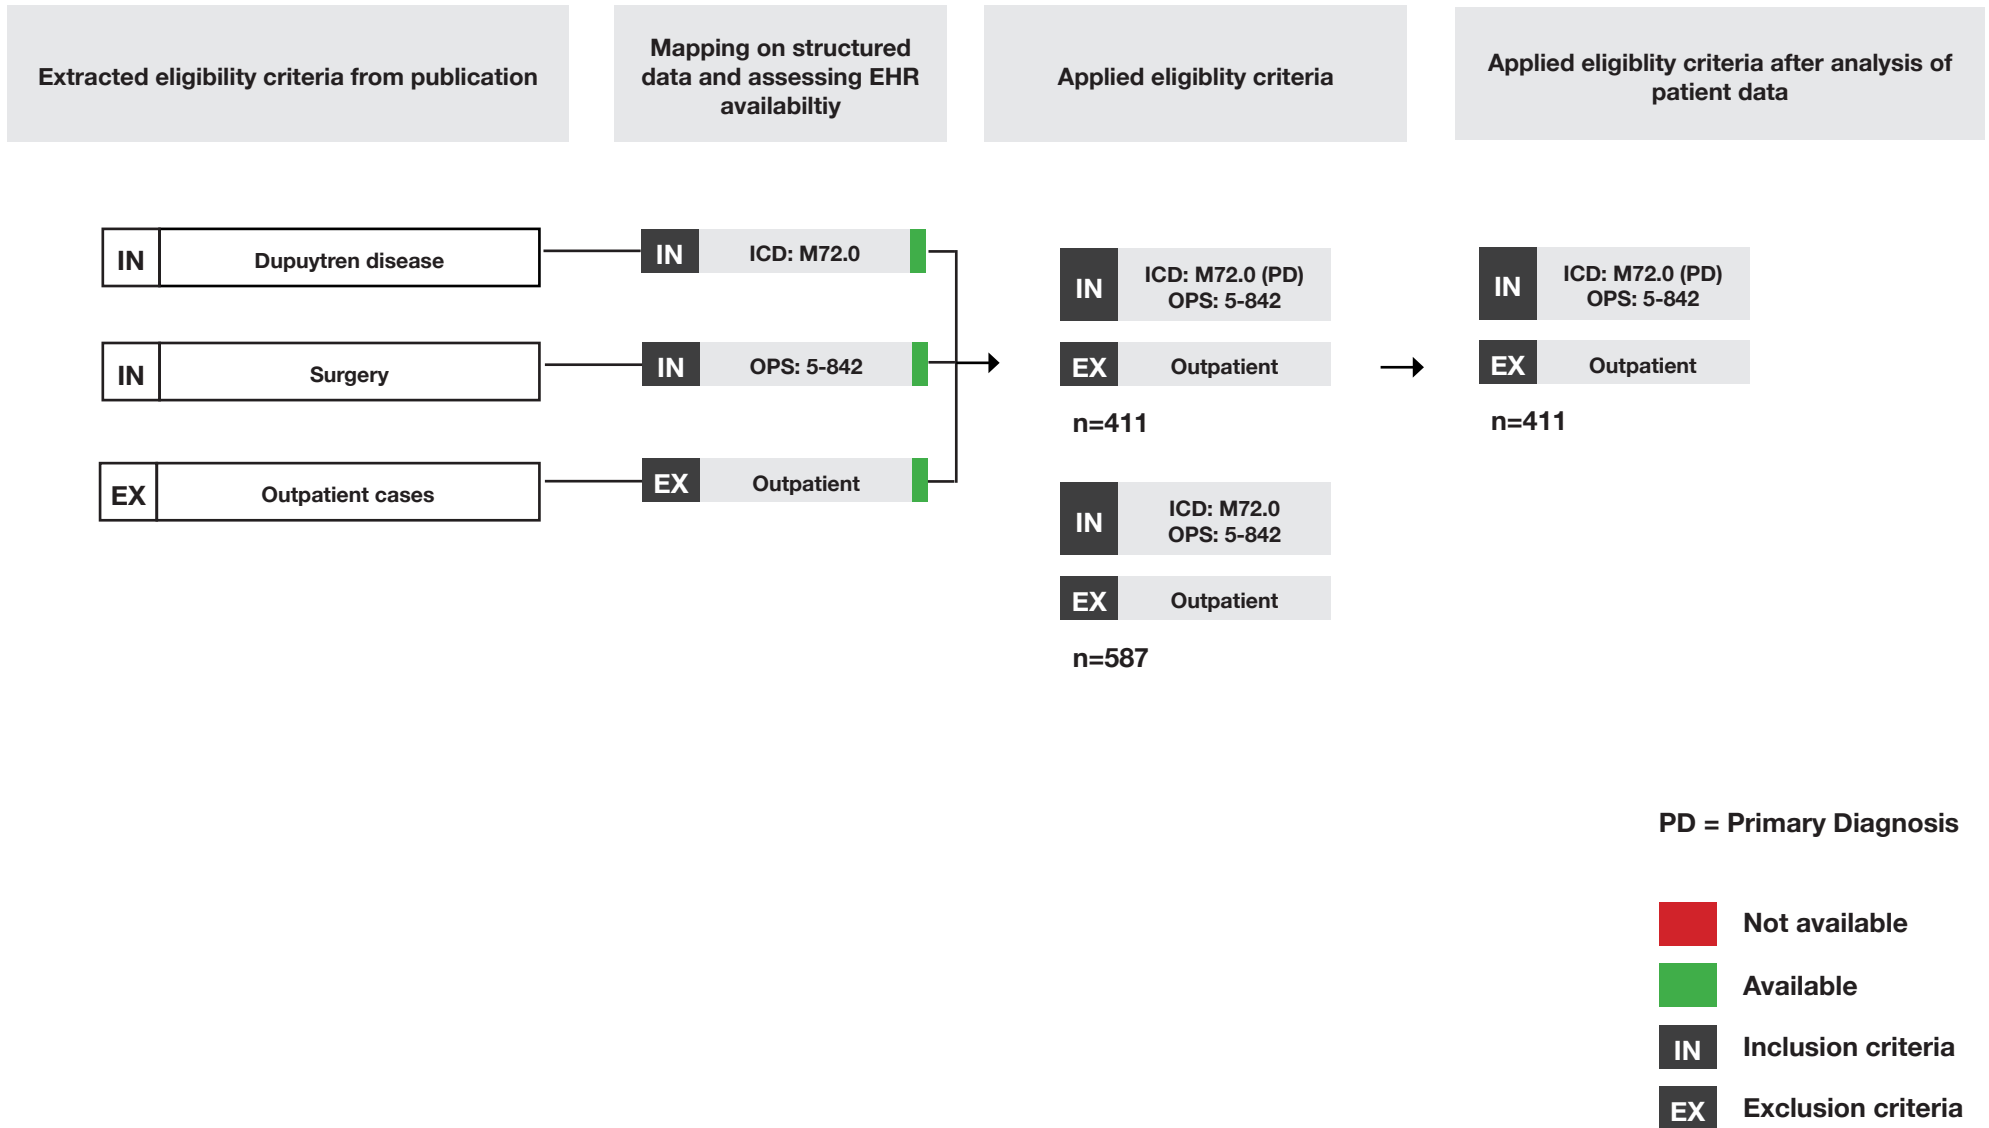

# Mapping of eligibility criteria - DG Study

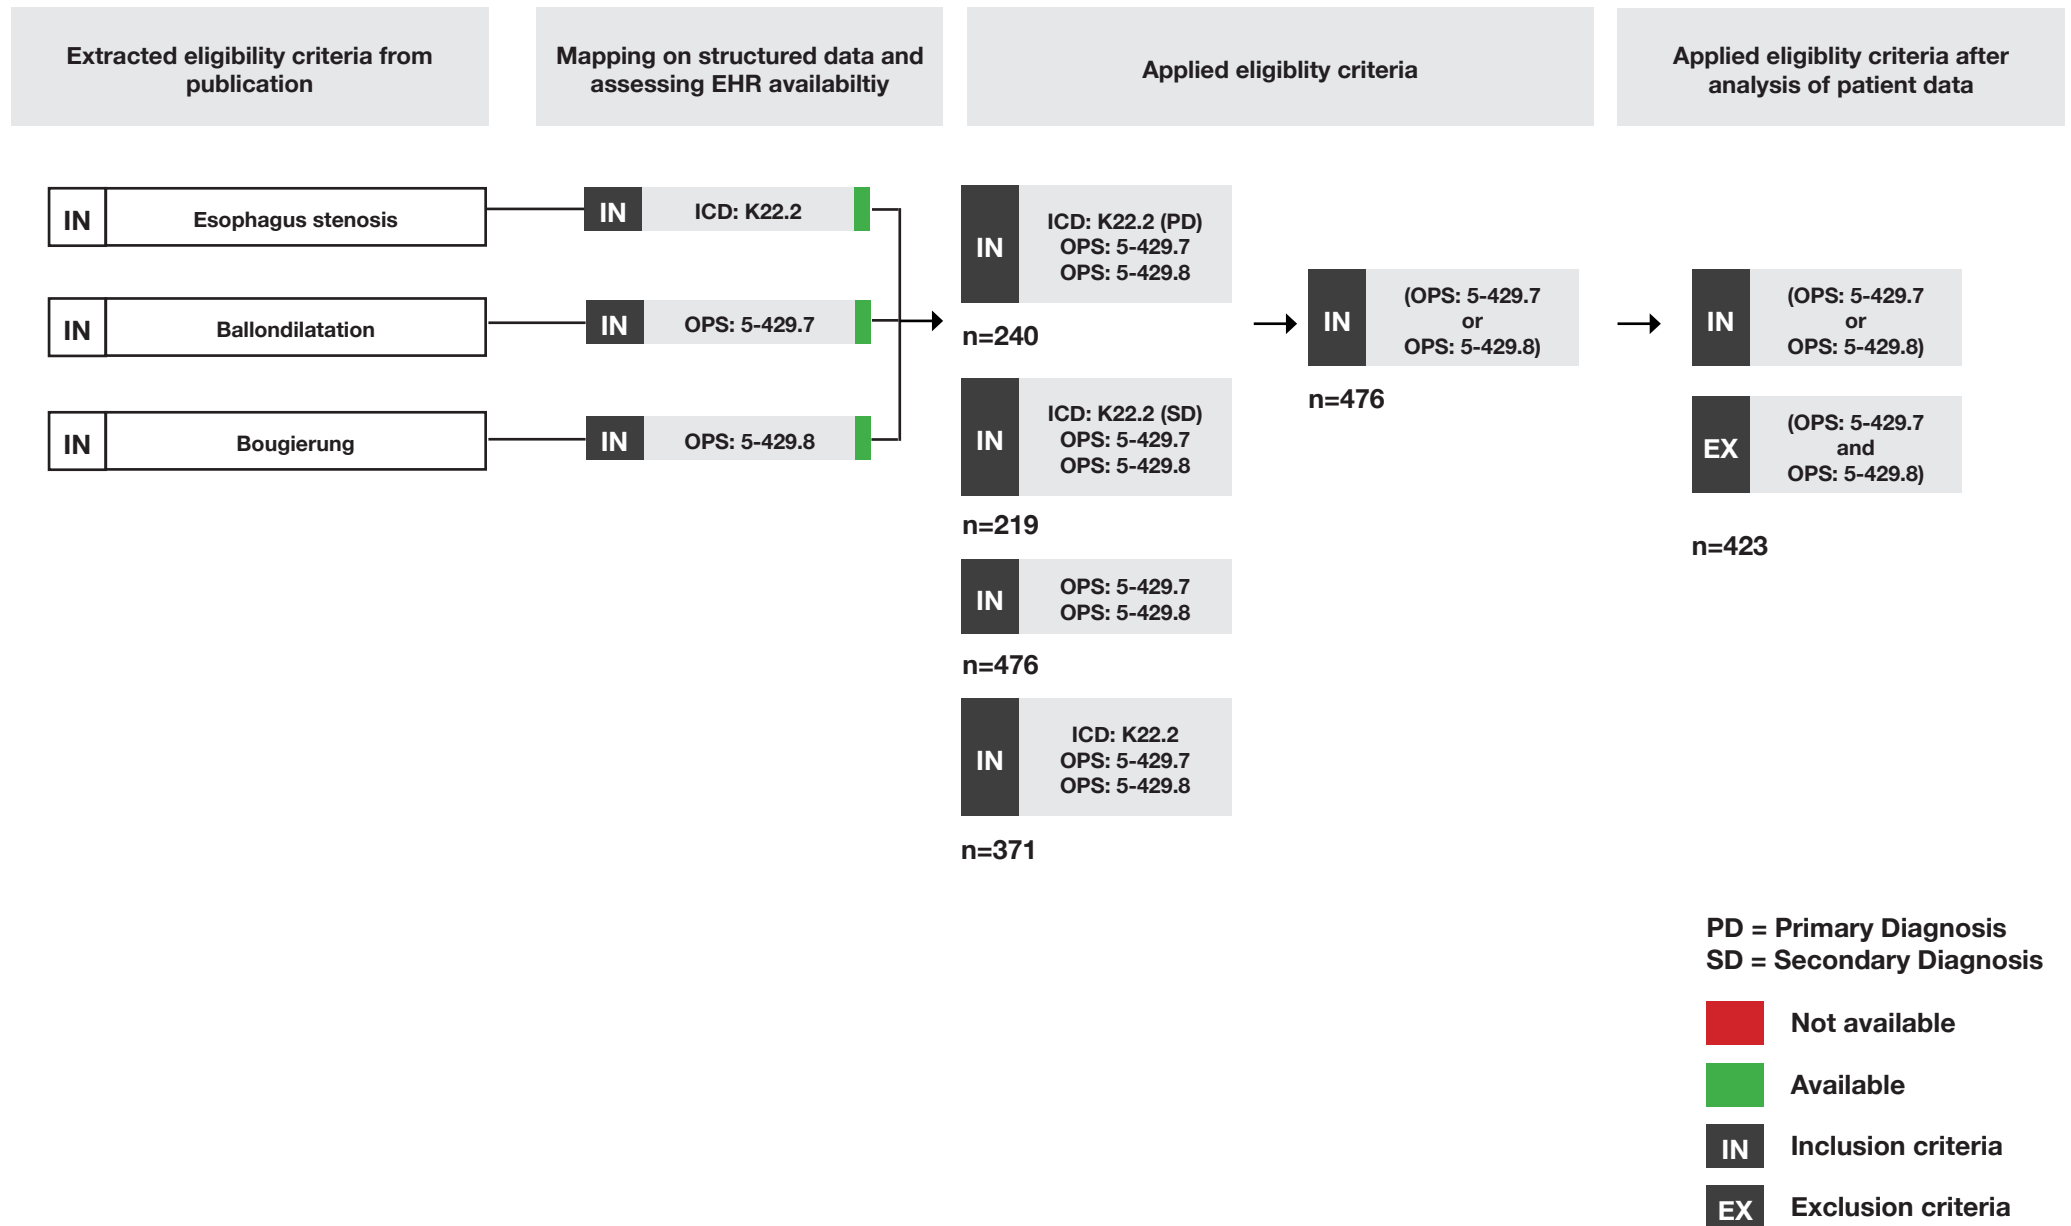



# Mapping of eligibility criteria - DRO Study

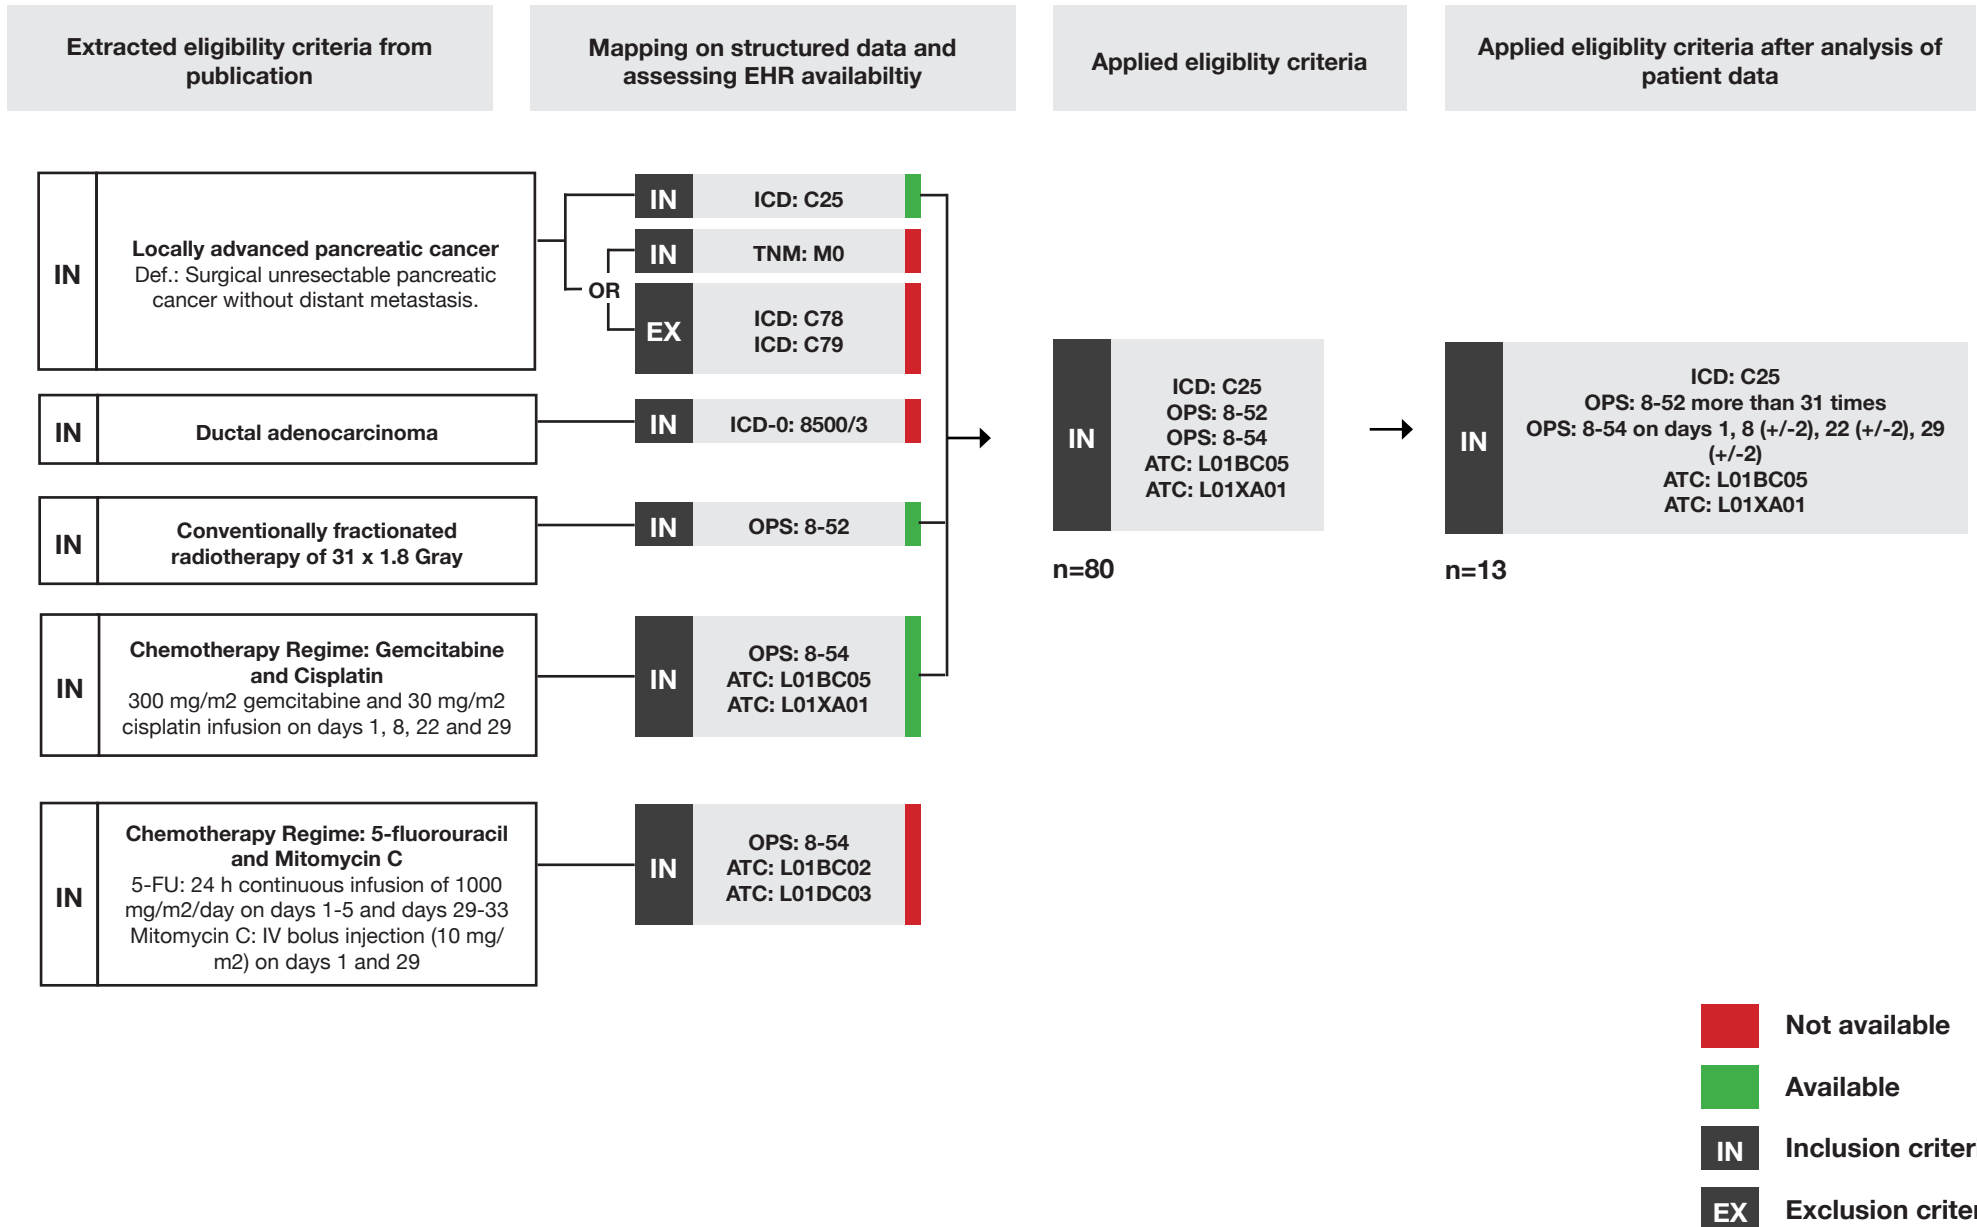

## Overview of available data sources in the EHR

| <b>Administrative Data</b>                                                           |
|--------------------------------------------------------------------------------------|
| <b>Structured Data</b>                                                               |
| Date of birth                                                                        |
| Sex                                                                                  |
| Admission date                                                                       |
| Discharge date                                                                       |
| Diagnostic codes (ICD), primary and secondary diagnoses, timestamps, data provenance |
| Procedure codes (OPS), timestamps, data provenance                                   |
| Date of death                                                                        |

| <b>Clinical Data</b>     |
|--------------------------|
| <b>Structured Data</b>   |
| Laboratory               |
| Medication (ATC)         |
| <b>Unstructured data</b> |
| Pathology reports        |
| Operations notes         |

| <b>Registry Data</b>   |
|------------------------|
| <b>Structured data</b> |
| ICD-O-3                |

## Overview of available data in accordance with eligibility criteria applied: DPS Study

| Applied eligibility criteria                            |
|---------------------------------------------------------|
| <b>Inclusion</b><br>1. ICD: M72.0 (HD)<br>2. OPS: 5-842 |
| <b>Exclusion</b><br>1. Outpatient                       |

EHR

i2b2

Overall data period: Nov 1999 - Sep 2016

| Administrative Data                                        |            |                       |
|------------------------------------------------------------|------------|-----------------------|
| Structured Data                                            |            |                       |
| Attributes                                                 | No. (%)    | Average per encounter |
| Sex                                                        | 411 (100)  | -                     |
| Date of Birth                                              | 411 (100)  | -                     |
| Diagnosis codes (ICD 10-GM)<br>Period: Nov 1999 - Sep 2016 | 411 (100)  | 1                     |
| Procedure codes (OPS)<br>Period: Nov 1999 - Sep 2016       | 411 (100)  | 1                     |
| Clinical Data                                              |            |                       |
| Structured Data                                            |            |                       |
| Attributes                                                 | No. (%)    | Average per encounter |
| Laboratory<br>Period: Jan 2001 - Dec 2012                  | 185 (45)   | 0.40                  |
| Unstructured Data                                          |            |                       |
| Attributes                                                 | No. (%)    | Average per encounter |
| Pathology Reports<br>Period: May 2000 - May 2016           | 313 (76.2) | 0.71                  |
| Operation Notes<br>Period: Nov 2000 - Sep 2016             | 373 (90.8) | 0.91                  |

### Description

Availability of attributes per patient and the average availability per encounter.

# Overview of available data in accordance with eligibility criteria applied: DG Study

| Applied eligibility criteria                        |
|-----------------------------------------------------|
| <b>Inclusion</b><br>1. OPS: 5-429.7 or OPS: 5-429.8 |

| Applied eligibility criteria                         |
|------------------------------------------------------|
| <b>Inclusion</b><br>1. OPS: 5-429.7 or OPS: 5-429.8  |
| <b>Exclusion</b><br>1. OPS: 5-429.7 and OPS: 5-429.8 |

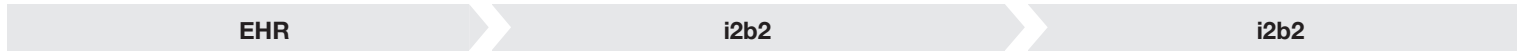

Overall data period: Jan 2000 - Sep 2016

| Administrative Data                                        |            |                       |
|------------------------------------------------------------|------------|-----------------------|
| Structured Data                                            |            |                       |
| Attributes                                                 | No. (%)    | Average per encounter |
| Sex                                                        | 476 (100)  | -                     |
| Date of Birth                                              | 476 (100)  | -                     |
| Date of Death                                              | 107 (22.5) | -                     |
| Diagnosis codes (ICD 10-GM)<br>Period: Jun 2001 - Sep 2016 | 454 (95.4) | 0.96                  |
| Procedure codes (OPS)<br>Period: Dec 2000 - Sep 2016       | 476 (100)  | 1                     |
| Clinical Data                                              |            |                       |
| Structured Data                                            |            |                       |
| Attributes                                                 | No. (%)    | Average per encounter |
| Laboratory<br>Period: Dec 2002 - Jan 2012                  | 255 (53.6) | 0.45                  |
| Unstructured Data                                          |            |                       |
| Attributes                                                 | No. (%)    | Average per encounter |
| Pathology Reports<br>Period: Sep 2001 - Jun 2016           | 186 (39.1) | 0.21                  |
| Operation Notes<br>Period: Jan 2001 - Aug 2016             | 41 (8.6)   | 0.03                  |

Overall data period: Dec 2000 - Sep 2016

| Administrative Data                                        |            |                       |
|------------------------------------------------------------|------------|-----------------------|
| Structured Data                                            |            |                       |
| Attributes                                                 | No. (%)    | Average per encounter |
| Sex                                                        | 423 (100)  | -                     |
| Date of Birth                                              | 423 (100)  | -                     |
| Date of Death                                              | 93 (21.9)  | -                     |
| Diagnosis codes (ICD 10-GM)<br>Period: Jun 2001 - Sep 2016 | 404 (95.5) | 0.96                  |
| Procedure codes (OPS)<br>Period: Dec 2000 - Sep 2016       | 423 (100)  | 1                     |
| Clinical Data                                              |            |                       |
| Structured Data                                            |            |                       |
| Attributes                                                 | No. (%)    | Average per encounter |
| Laboratory<br>Period: Dec 2002 - Jan 2012                  | 213 (50.3) | 0.44                  |
| Unstructured Data                                          |            |                       |
| Attributes                                                 | No. (%)    | Average per encounter |
| Pathology Reports<br>Period: Sep 2001 - Jun 2016           | 161 (38.1) | 0.25                  |
| Operation Notes<br>Period: Jan 2001 - Aug 2016             | 35 (8.3)   | 0.04                  |

**Description**  
Availability of attributes per patient and the average availability per encounter.

# Overview of available data in accordance with eligibility criteria applied: DRO Study

| Applied eligibility criteria |           |
|------------------------------|-----------|
| 1.                           | ICD: C25  |
| 2.                           | OPS: 8-52 |
| 3.                           | OPS: 8-54 |

| Applied eligibility criteria |              |
|------------------------------|--------------|
| 1.                           | ICD: C25     |
| 2.                           | OPS: 8-52    |
| 3.                           | OPS: 8-54    |
| 4.                           | ATC: L01BC05 |
| 5.                           | ATC: L01XA01 |

| Applied eligibility criteria |                                       |
|------------------------------|---------------------------------------|
| 1.                           | ICD: C25                              |
| 2.                           | OPS: 8-52 more than 31 times          |
| 3.                           | OPS: 8-54 on days 1, 8, 22, 29 (+/-2) |
| 4.                           | ATC: L01BC05                          |
| 5.                           | ATC: L01XA01                          |

EHR

i2b2

i2b2

i2b2

Overall data period: Jan 2000 - Jun 2015

Overall data period: Oct 2007 - Sep 2015

Overall data period: Jan 2008 - May 2015

| Administrative Data                                        |            |                       |  |
|------------------------------------------------------------|------------|-----------------------|--|
| Structured Data                                            |            |                       |  |
| Attributes                                                 | No. (%)    | Average per encounter |  |
| Sex                                                        | 243 (100)  | -                     |  |
| Date of Birth                                              | 243 (100)  | -                     |  |
| Date of Death                                              | 49 (20.2)  | -                     |  |
| Diagnosis codes (ICD 10-GM)<br>Period: Jan 2000 - Sep 2015 | 243 (100)  | 0.97                  |  |
| Procedure codes (OPS)<br>Period: Oct 2002 - Sep 2015       | 243 (100)  | 0.80                  |  |
| Clinical Data                                              |            |                       |  |
| Structured Data                                            |            |                       |  |
| Attributes                                                 | No. (%)    | Average per encounter |  |
| Laboratory<br>Period: Aug 2003 - Jan 2012                  | 181 (74.4) | 0.38                  |  |
| Medication (ATC)<br>Period: Jan 2004 - Sep 2015            | 186 (76.5) | 0.26                  |  |
| Unstructured Data                                          |            |                       |  |
| Attributes                                                 | No. (%)    | Average per encounter |  |
| Pathology Reports<br>Period: Oct 2002 - Jun 2015           | 40 (16.5)  | 0.02                  |  |
| Operation Notes<br>Period: Jan 2008 - Nov 2014             | 76 (31.3)  | 0.03                  |  |
| Registry Data                                              |            |                       |  |
| Structured Data                                            |            |                       |  |
| Attributes                                                 | No. (%)    | Average per encounter |  |
| ICD-O-3<br>Period: Jun 2015                                | 1 (0.4)    | -                     |  |

| Administrative Data                                        |           |                       |  |
|------------------------------------------------------------|-----------|-----------------------|--|
| Structured Data                                            |           |                       |  |
| Attributes                                                 | No. (%)   | Average per encounter |  |
| Sex                                                        | 80 (100)  | -                     |  |
| Date of Birth                                              | 80 (100)  | -                     |  |
| Date of Death                                              | 18 (22.5) | -                     |  |
| Diagnosis codes (ICD 10-GM)<br>Period: Oct 2007 - Sep 2015 | 80 (100)  | 0.995                 |  |
| Procedure codes (OPS)<br>Period: Oct 2007 - Jul 2015       | 80 (100)  | 0.87                  |  |
| Clinical Data                                              |           |                       |  |
| Structured Data                                            |           |                       |  |
| Attributes                                                 | No. (%)   | Average per encounter |  |
| Laboratory<br>Period: Oct 2010 - Jan 2012                  | 69 (86.3) | 0.47                  |  |
| Medication (ATC)<br>Period: Nov 2007 - Nov 2014            | 80 (100)  | 0.34                  |  |
| Unstructured Data                                          |           |                       |  |
| Attributes                                                 | No. (%)   | Average per encounter |  |
| Pathology Reports<br>Period: Apr 2008 - Apr 2013           | 15 (18.8) | 0.02                  |  |
| Operation Notes<br>Period: Jun 2008 - May 2014             | 23 (29)   | 0.02                  |  |
| Registry Data                                              |           |                       |  |
| Structured Data                                            |           |                       |  |
| Attributes                                                 | No. (%)   | Average per encounter |  |
| ICD-O-3<br>Period: -                                       | -         | -                     |  |

| Administrative Data                                        |           |                       |  |
|------------------------------------------------------------|-----------|-----------------------|--|
| Structured Data                                            |           |                       |  |
| Attributes                                                 | No. (%)   | Average per encounter |  |
| Sex                                                        | 13 (100)  | -                     |  |
| Date of Birth                                              | 13 (100)  | -                     |  |
| Date of Death                                              | 3 (21.4)  | -                     |  |
| Diagnosis codes (ICD 10-GM)<br>Period: Jan 2008 - May 2015 | 13 (100)  | 1                     |  |
| Procedure codes (OPS)<br>Period: Jan 2008 - May 2015       | 13 (100)  | 0.86                  |  |
| Clinical Data                                              |           |                       |  |
| Structured Data                                            |           |                       |  |
| Attributes                                                 | No. (%)   | Average per encounter |  |
| Laboratory<br>Period: Jan 2008 - Nov 2011                  | 11 (84.6) | 0.47                  |  |
| Medication (ATC)<br>Period: Jan 2008 - Oct 2012            | 13 (100)  | 0.27                  |  |
| Unstructured Data                                          |           |                       |  |
| Attributes                                                 | No. (%)   | Average per encounter |  |
| Pathology Reports<br>Period: Apr 2008 - Mar 2013           | 3 (23.1)  | 0.02                  |  |
| Operation Notes<br>Period: Aug 2008 - Dec 2009             | 3 (23.1)  | 0.02                  |  |
| Registry Data                                              |           |                       |  |
| Structured Data                                            |           |                       |  |
| Attributes                                                 | No. (%)   | Average per encounter |  |
| ICD-O-3<br>Period: -                                       | -         | -                     |  |

**Description**  
Availability of attributes per patient and the average availability per encounter.

# Fluctuating numbers of diagnoses per encounter

DPS Study

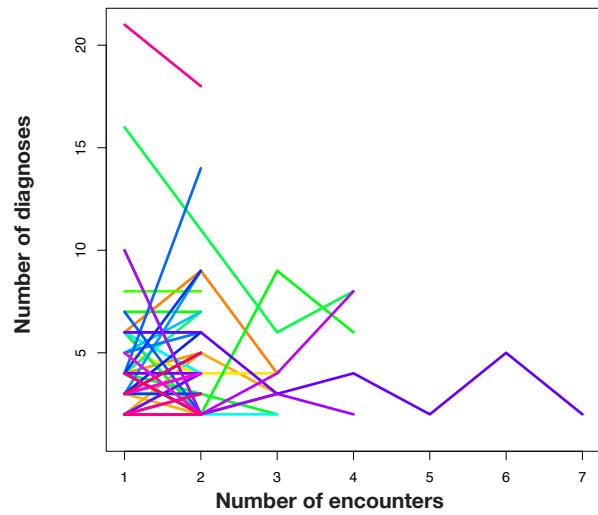

DG Study

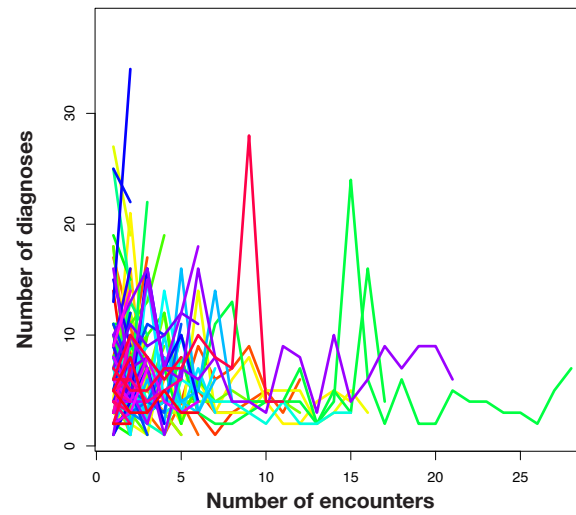

DRO Study

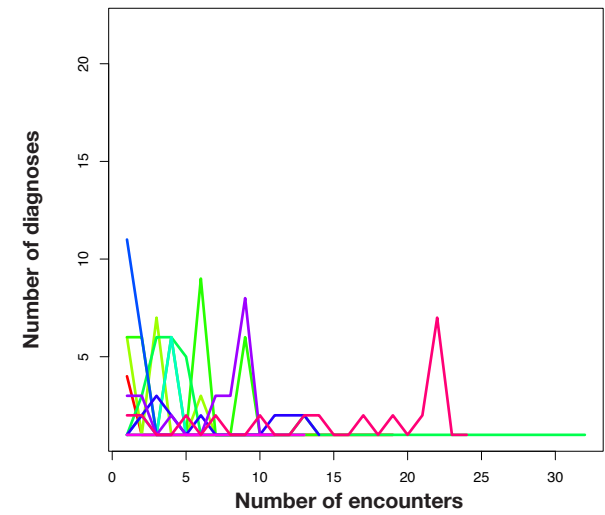

# Potential coding inconsistencies in chronic diseases and lifestyle factors - DPS Study

## Chronic diseases

### E10-E14 Diabetes mellitus

3 of 25 patient show inconsistency:

| Patient ID | Encounter | Consistency |
|------------|-----------|-------------|
| 1182       | 6370      | Coded       |
|            | 6400      | Not coded   |
| 985        | 6585      | Not coded   |
|            | 6758      | Coded       |
| 994        | 6760      | Not coded   |
|            | 6813      | Coded       |

### G40.- Epilepsy

2 of 5 patient show inconsistency:

| Patient ID | Encounter | Consistency |
|------------|-----------|-------------|
| 1084       | 6310      | Coded       |
|            | 6461      | Coded       |
|            | 6601      | Coded       |
|            | 6634      | Not coded   |
|            | 6648      | Not coded   |
|            | 6723      | Not coded   |
|            | 6857      | Not coded   |
| 902        | 6388      | Not coded   |
|            | 6539      | Coded       |
|            | 6628      | Not coded   |

## Lifestyle

### F10.- Mental and behavioural disorders due to use of alcohol

1 of 11 patient show inconsistency:

| Patient ID | Encounter | Consistency |
|------------|-----------|-------------|
| 775        | 6618      | Not coded   |
|            | 6722      | Not coded   |
|            | 6771      | Coded       |

### F17.- Mental and behavioural disorders due to use of tobacco

2 of 4 patient show inconsistency:

| Patient ID | Encounter | Consistency |
|------------|-----------|-------------|
| 784        | 6466      | Coded       |
|            | 6603      | Not coded   |
| 1112       | 6358      | Not coded   |
|            | 6683      | Not coded   |
|            | 6812      | Not coded   |
|            | 6862      | Coded       |

# Overview of the eligible radiochemotherapies protocols - DRO Study

## OPS:8-54: Chemotherapy

| Patient ID | CODE     | T1 | T2 | T3 | T4 | N |
|------------|----------|----|----|----|----|---|
| 3          | OPS:8-54 | 0  | 8  | 23 | 29 | 4 |
| 14         | OPS:8-54 | 0  | 8  | 23 | 30 | 4 |
| 27         | OPS:8-54 | 0  | 8  | 22 | 29 | 4 |
| 33         | OPS:8-54 | 0  | 7  | 22 | 29 | 4 |
| 76         | OPS:8-54 | 0  | 7  | 23 | 28 | 4 |
| 82         | OPS:8-54 | 0  | 8  | 22 | 30 | 4 |
| 86         | OPS:8-54 | 0  | 7  | 20 | 28 | 4 |
| 106        | OPS:8-54 | 0  | 8  | 22 | 29 | 4 |
| 163        | OPS:8-54 | 0  | 8  | 22 | 29 | 4 |
| 169        | OPS:8-54 | 0  | 7  | 21 | 28 | 4 |
| 195        | OPS:8-54 | 0  | 10 | 23 | 28 | 4 |
| 205        | OPS:8-54 | 0  | 8  | 24 | 31 | 4 |
| 223        | OPS:8-54 | 0  | 9  | 23 | 29 | 4 |

## OPS:8-522: Radiotherapy

| Patient ID | CODE      | T1 | T2 | T3 | T4 | T5 | T6 | T7 | T8 | T9 | T10 | T11 | T12 | T13 | T14 | T15 | T16 | T17 | T18 | T19 | T20 | T21 | T22 | T23 | T24 | T25 | T26 | T27 | T28 | T29 | T30 | T31 | T32 | N  |
|------------|-----------|----|----|----|----|----|----|----|----|----|-----|-----|-----|-----|-----|-----|-----|-----|-----|-----|-----|-----|-----|-----|-----|-----|-----|-----|-----|-----|-----|-----|-----|----|
| 3          | OPS:8-522 | 0  | 2  | 3  | 4  | 5  | 8  | 9  | 10 | 11 | 12  | 15  | 16  | 17  | 19  | 22  | 23  | 24  | 25  | 26  | 29  | 30  | NA  | NA  | NA  | NA  | NA  | NA  | NA  | NA  | NA  | NA  | NA  | 21 |
| 14         | OPS:8-522 | 0  | 2  | 3  | 6  | 7  | 8  | 9  | 10 | 13 | 14  | 15  | 16  | 17  | 20  | 22  | 23  | 24  | 27  | 28  | 29  | 30  | 31  | 34  | 35  | 36  | 37  | 38  | 41  | 42  | 43  | 44  | NA  | 31 |
| 27         | OPS:8-522 | 0  | 2  | 3  | 6  | 8  | 9  | 10 | 13 | 14 | 15  | 16  | 17  | 21  | 22  | 23  | 24  | 27  | 28  | 29  | 30  | 31  | 34  | 35  | 36  | 37  | 38  | 41  | 42  | NA  | NA  | NA  | NA  | 28 |
| 33         | OPS:8-522 | 0  | 2  | 3  | 4  | 5  | 8  | 9  | 10 | 11 | 12  | 15  | 17  | 18  | 18  | 19  | 22  | 23  | 24  | 25  | 26  | 31  | 32  | 34  | 36  | 37  | 38  | 40  | 43  | 44  | 45  | NA  | NA  | 30 |
| 76         | OPS:8-522 | 0  | 2  | 3  | 4  | 5  | 8  | 9  | 10 | 11 | 12  | 15  | 16  | 17  | 18  | 19  | 22  | 23  | 23  | 24  | 25  | 26  | 29  | 30  | 31  | 32  | 33  | 36  | 37  | 38  | 39  | 43  | 44  | 32 |
| 82         | OPS:8-522 | 0  | 2  | 3  | 4  | 5  | 8  | 9  | 10 | 11 | 12  | 15  | 16  | 17  | 18  | 19  | 22  | 23  | 24  | 25  | 26  | 29  | 30  | 31  | 32  | 33  | 34  | 36  | 37  | 43  | 44  | NA  | NA  | 30 |
| 86         | OPS:8-522 | 0  | 2  | 3  | 4  | 5  | 9  | 10 | 11 | 12 | 13  | 15  | 16  | 17  | 22  | 23  | 24  | 25  | 26  | 29  | 31  | 33  | 36  | 37  | 38  | 39  | 40  | 43  | 44  | 45  | 46  | NA  | NA  | 30 |
| 106        | OPS:8-522 | 0  | 1  | 2  | 3  | 4  | 8  | 9  | 10 | 11 | 11  | 15  | 15  | 16  | 17  | 18  | 21  | 22  | 23  | 24  | 25  | 28  | 29  | 30  | 31  | 32  | 35  | 36  | 37  | 38  | 39  | 42  | 43  | 32 |
| 163        | OPS:8-522 | 0  | 9  | 10 | 11 | 12 | 15 | 16 | 17 | 18 | 19  | 22  | 23  | 24  | 25  | 26  | 29  | 30  | 31  | 32  | 33  | 36  | 37  | 38  | 39  | 40  | 43  | 44  | NA  | NA  | NA  | NA  | NA  | 27 |
| 169        | OPS:8-522 | 0  | 2  | 3  | 4  | 5  | 8  | 9  | 10 | 11 | 12  | 15  | 16  | 17  | 18  | 19  | 22  | 23  | 24  | 25  | 26  | 29  | 30  | 31  | 32  | 33  | 37  | 38  | 39  | 40  | 43  | 44  | NA  | 31 |
| 195        | OPS:8-522 | 0  | 2  | 4  | 6  | 7  | 7  | 8  | 11 | 12 | 13  | 14  | 15  | 18  | 19  | 20  | 21  | 23  | 25  | 26  | 27  | 28  | 29  | 33  | 33  | 34  | 35  | 36  | 39  | 40  | 41  | 42  | NA  | 31 |
| 205        | OPS:8-522 | 0  | 2  | 3  | 4  | 5  | 8  | 9  | 10 | 11 | 12  | 15  | 16  | 17  | 18  | 19  | 22  | 23  | 24  | 25  | 26  | 29  | 30  | 31  | 32  | 33  | 36  | 37  | 38  | 39  | 39  | 40  | NA  | 31 |
| 223        | OPS:8-522 | 0  | 1  | 2  | 3  | 6  | 8  | 8  | 9  | 10 | 13  | 14  | 15  | 17  | 20  | 22  | 22  | 23  | 24  | 27  | 29  | 29  | 30  | 31  | 34  | 35  | 36  | 37  | 38  | 41  | 42  | 43  | NA  | 31 |



# Overview of assigned ICD:C25 throughout the encounters per patient ID - DRO Study

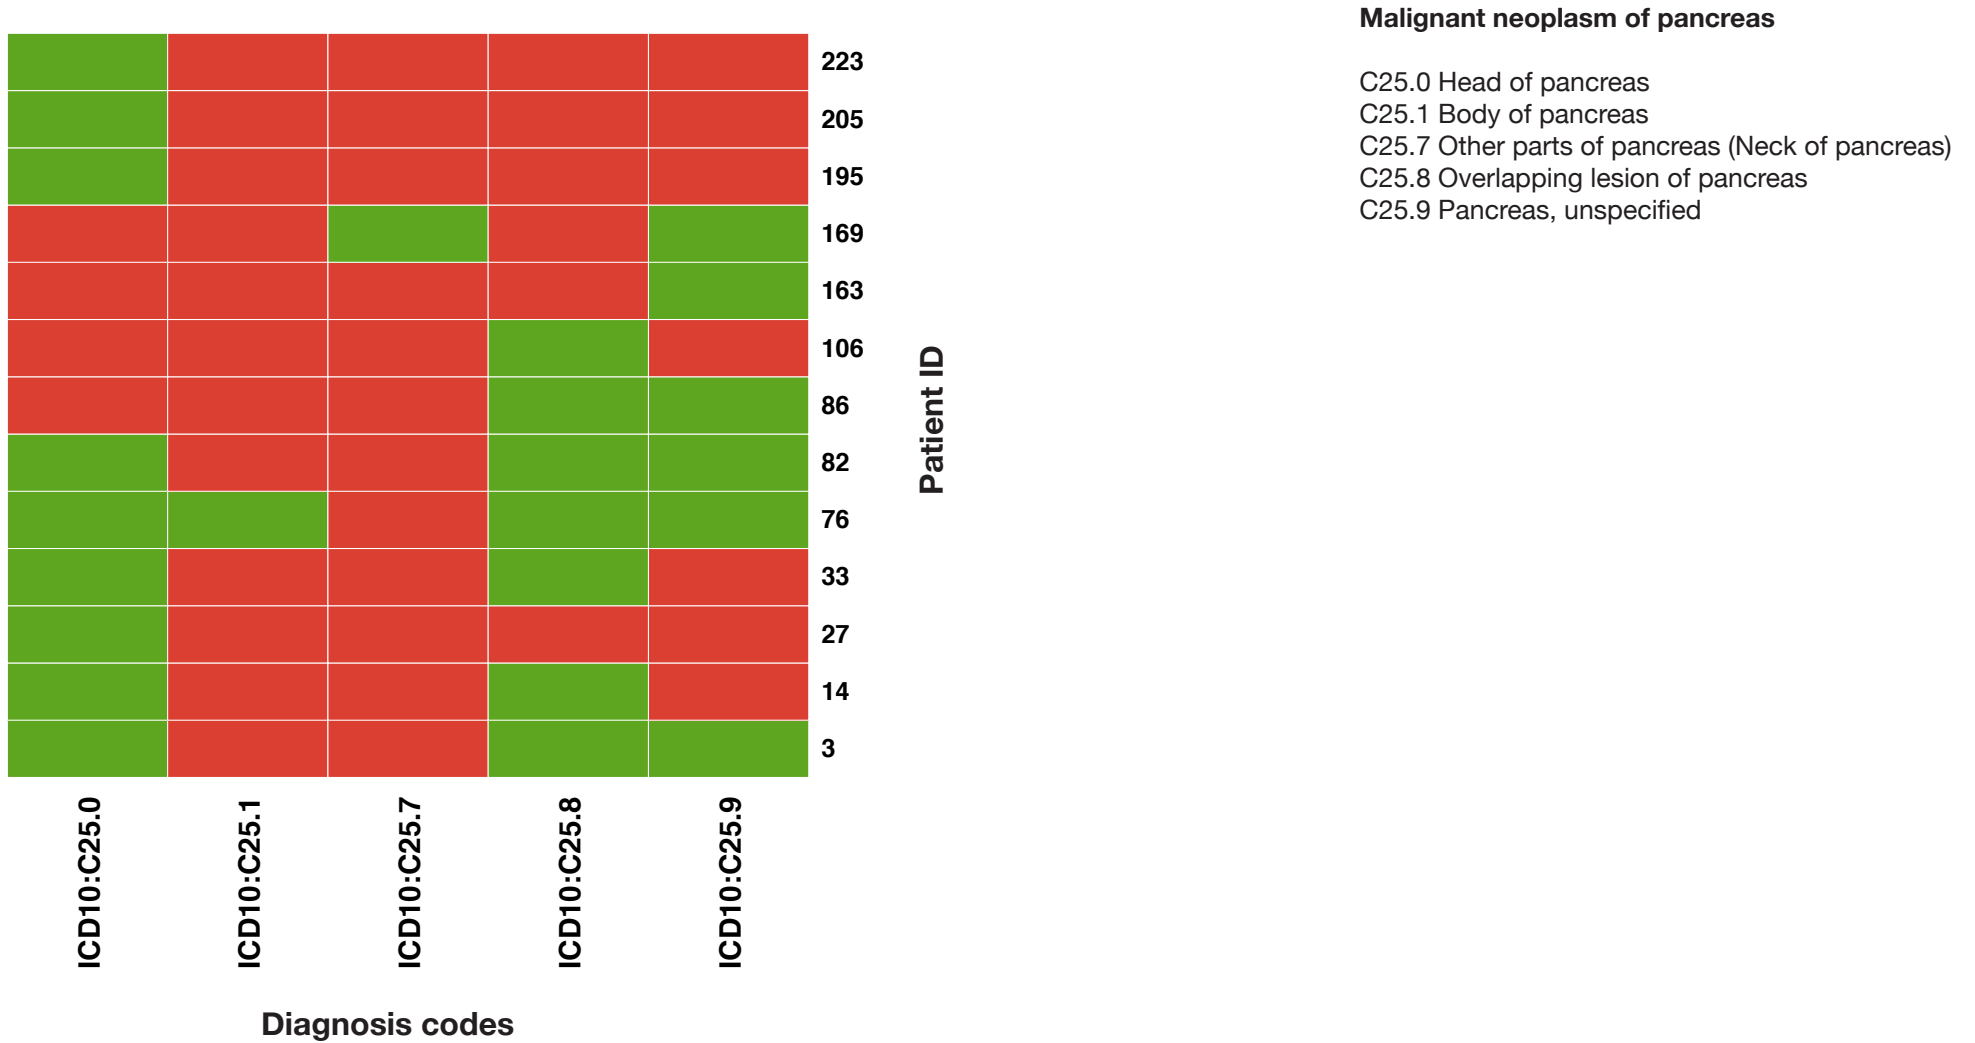

Supplement: 12911_2019_939_MOESM1_ESM.pdf [file 12911_2019_939_MOESM1_ESM.pdf]
